# Supplementary material for: Comparing Seamounts and Coral Reefs with eDNA and BRUVS Reveals Oases and Refuges on Shallow Seamounts
Source: MDPI journal article supplement (doi:10.3390/biology12111446), 2023-11-17
Supplement: s1 [file s1]

# **Supplementary Materials: Environmental DNA and Video Surveys of Seamounts and Coral Reefs Reveal Biomass Oases on Shallow Seamounts**

**Supplementary Section S1: General data description**

**Table S1:** BRUVS and eDNA samples collected on 5 different environments: coral reefs (15 m), seamounts (50 m), continental slopes (150 m), seamounts (250 m) and seamounts (500 m).

| Environment    | Site name        | Latitude  | Longitude | Summit depth (m) | Summit height (m) | eDNA        | BRUVS                  |             |                        |
|----------------|------------------|-----------|-----------|------------------|-------------------|-------------|------------------------|-------------|------------------------|
|                |                  |           |           |                  |                   | Sample size | Sample depth range (m) | Sample size | Sample depth range (m) |
| Coral reef     | Noumea           | -22.29341 | 166.2149  | -                | -                 | 6           | 10.6 - 14.3            | 13          | 8.8 - 14               |
|                | St Vincent       | -22.05113 | 165.9717  | -                | -                 | 6           | 10.9 - 13.9            | 14          | 5.5 - 15               |
|                | Bourail          | -21.68457 | 165.4693  | -                | -                 | 6           | 2.5 - 19.5             | 15          | 1.9 - 23.4             |
|                | Nepoui           | -21.39059 | 164.928   | -                | -                 | 6           | 4.6 - 18.9             | 16          | 3.2 - 19.8             |
|                | Gatope           | -20.9797  | 164.5894  | -                | -                 | 6           | 6.7 - 19.7             | 15          | 4.4 - 22               |
|                | Poum             | -20.36597 | 163.9297  | -                | -                 | 6           | 7.7 - 16.6             | 16          | 7.1 - 20               |
|                | Grand Lagon Nord | -19.41589 | 163.2245  | -                | -                 | 6           | 20 - 22.5              | 14          | 18 - 28                |
| Seamount_50    | Torche           | -22.87503 | 167.6631  | 45               | 1318              | 10          | 45 - 58                | 5           | 47 - 62                |
|                | Antigonia        | -23.42824 | 168.0752  | 54               | 1330              | 10          | 54 - 70                | 8           | 56 - 66                |
|                | Capel            | -25.03758 | 159.5323  | 60               | 3054              | 10          | 60 - 70                | 10          | 65 - 69                |
|                | Fairway          | -21.04964 | 162.255   | 62               | 2964              | 10          | 62 - 67                | 10          | 63 - 67                |
| Deep slope_150 | St Vincent       | -22.12531 | 166.0376  | -                | -                 | 10          | 80 - 219               | 7           | 120 - 180              |
|                | Nepoui           | -21.42488 | 164.9774  | -                | -                 | 10          | 88 - 218               | 10          | 105 - 150              |
|                | Poum             | -20.15007 | 163.7853  | -                | -                 | 10          | 100 - 185              | 8           | 100 - 220              |
|                | Grand Lagon Nord | -19.45239 | 163.2159  | -                | -                 | 10          | 85 - 235               | 10          | 118 - 150              |
| Seamount_250   | Crypthelia       | -23.3078  | 168.2498  | 195              | 1627              | 10          | 201 - 236              | 9           | 200 - 244              |
|                | Kaimon Maru      | -24.74137 | 168.1411  | 236              | 1799              | 10          | 238 - 325              | 8           | 238 - 340              |
|                | Jumeau Ouest     | -23.68215 | 168.0081  | 239              | 1119              | 10          | 242 - 313              | 8           | 245 - 339              |
|                | Argo             | -23.09286 | 159.463   | 299              | 2251              | 10          | 299 - 313              | 8           | 301 - 312              |
| Seamount_500   | Stylaster        | -23.6461  | 167.7134  | 434              | 801               | 10          | 439 - 488              | 8           | 444 - 491              |
|                | Ile Des Pins     | -22.38325 | 167.407   | 470              | 818               | 10          | 469 - 488              | 5           | 480 - 506              |
|                | Eponge           | -24.91183 | 168.363   | 511              | 1932              | 10          | 518 - 570              | 7           | 520 - 552              |

**Table S2:** Environmental variables used in the BRT modelling of species richness, fish biomass and large predator biomass for BRUVS, and eDNA MOTU richness. BRUVS micro-habitat variables were extracted through a semi-quantitative scale. Micro-habitat covers were evaluated on a 0-100% at a 5% precision. Substrate complexity and topography were evaluated on a scale of 0 to 5 and transformed in percentages. These variables were then used to calculate the Shannon diversity indices used in the boosted regression tree modelling.

| Variable name                  | Description                                                                                                                                                                                                                      | Use in BRTs          | Reference                                    | Source                                                                                                                                                                                                                                            |
|--------------------------------|----------------------------------------------------------------------------------------------------------------------------------------------------------------------------------------------------------------------------------|----------------------|----------------------------------------------|---------------------------------------------------------------------------------------------------------------------------------------------------------------------------------------------------------------------------------------------------|
| Depth                          | Depth value taken on the ship's echo sounder                                                                                                                                                                                     | Used                 | (Priede et al. 2013; Letessier et al. 2019)  | Ship                                                                                                                                                                                                                                              |
| Habitat diversity (BRUVS only) | Shannon diversity indice on percentages of visually evaluated habitat features (Bare substrate, vegetation, filter feeders, coral, indetermined, sand, gravel, rubbles, rocks, reef structure, substrate complexity, topography) | Used                 | (Eduardo et al. 2018; Sih et al. 2019)       | BRUVS still images                                                                                                                                                                                                                                |
| Turbidity                      | Visually evaluated in four categories (Clear, Particulate, Turbid, Very turbid)                                                                                                                                                  | Used                 | (Baletaud et al. 2022)                       | BRUVS still images                                                                                                                                                                                                                                |
| Travel time                    | Time to travel from Noumea's center using the shortest path                                                                                                                                                                      | Used                 | (Maire et al. 2016)                          | (Maire et al. 2016)                                                                                                                                                                                                                               |
| Chl-a concentration            | Chlorophyll concentration in milligram.m3                                                                                                                                                                                        | Removed (correlated) | (Leitner et al. 2020)                        | <a href="https://resources.marine.copernicus.eu/product-detail/OCEANCOLOUR_GLO_CHL_L4_REP_OBSERVATIONS_009_082/INFORMATION">https://resources.marine.copernicus.eu/product-detail/OCEANCOLOUR_GLO_CHL_L4_REP_OBSERVATIONS_009_082/INFORMATION</a> |
| Seafloor temperature           | Seafloor potential temperature (degree C)                                                                                                                                                                                        | Used                 | (Tittensor et al. 2010; Woolley et al. 2016) | <a href="https://resources.marine.copernicus.eu/product-detail/GLOBAL_REANALYSIS_PHY_001_030/INFORMATION">https://resources.marine.copernicus.eu/product-detail/GLOBAL_REANALYSIS_PHY_001_030/INFORMATION</a>                                     |
| Minimal SST                    | Average sea surface temperature of the coldest month of each year over the last 10 years (degrees C).                                                                                                                            | Removed (correlated) | (Tittensor et al. 2010)                      | <a href="https://podaac.jpl.nasa.gov/dataset/MUR-JPL-L4-GLOB-v4.1">https://podaac.jpl.nasa.gov/dataset/MUR-JPL-L4-GLOB-v4.1</a>                                                                                                                   |

|                              |                                                                                            |                      |                         |                                                                                                                                                                                                                                     |
|------------------------------|--------------------------------------------------------------------------------------------|----------------------|-------------------------|-------------------------------------------------------------------------------------------------------------------------------------------------------------------------------------------------------------------------------------|
| Mean SST                     | Average temperature over the last 10 years (degrees C)                                     | Used                 | (Tittensor et al. 2010) | <a href="https://podaac.jpl.nasa.gov/dataset/MUR-JPL-L4-GLOB-v4.1">https://podaac.jpl.nasa.gov/dataset/MUR-JPL-L4-GLOB-v4.1</a>                                                                                                     |
| Maximal SST                  | Average temperature of the hottest month of each year over the last 10 years (degrees C).  | Removed (correlated) | (Tittensor et al. 2010) | <a href="https://podaac.jpl.nasa.gov/dataset/MUR-JPL-L4-GLOB-v4.1">https://podaac.jpl.nasa.gov/dataset/MUR-JPL-L4-GLOB-v4.1</a>                                                                                                     |
| Suspended particulate matter | Inorganic suspended particulate matter (g/m3)                                              | Removed (correlated) | (Capblancq 1990)        | <a href="https://resources.marine.copernicus.eu/product-download/OCEANCOLOUR_GLO_OPTICS_L4_REP_OBSERVATIONS_009_081">https://resources.marine.copernicus.eu/product-download/OCEANCOLOUR_GLO_OPTICS_L4_REP_OBSERVATIONS_009_081</a> |
| Salinity                     | Salinity (10 <sup>-3</sup> )                                                               | Removed (correlated) | (Barletta et al. 2005)  | <a href="https://resources.marine.copernicus.eu/product-detail/GLOBAL_REANALYSIS_PHY_001_030/INFORMATION">https://resources.marine.copernicus.eu/product-detail/GLOBAL_REANALYSIS_PHY_001_030/INFORMATION</a>                       |
| Eastward velocity            | Eastward velocity (m.s-1)                                                                  | Used                 | (Rogers 2018)           | <a href="https://resources.marine.copernicus.eu/product-detail/GLOBAL_REANALYSIS_PHY_001_030/INFORMATION">https://resources.marine.copernicus.eu/product-detail/GLOBAL_REANALYSIS_PHY_001_030/INFORMATION</a>                       |
| Northward velocity           | Northward velocity (m.s-1)                                                                 | Used                 | (Rogers 2018)           | <a href="https://resources.marine.copernicus.eu/product-detail/GLOBAL_REANALYSIS_PHY_001_030/INFORMATION">https://resources.marine.copernicus.eu/product-detail/GLOBAL_REANALYSIS_PHY_001_030/INFORMATION</a>                       |
| Environnemental stratum      | Coral reef, continental slope (150 m), seamount (50 m), seamount (250 m), seamount (500 m) | Used                 | This study              | Method                                                                                                                                                                                                                              |

## Supplementary Section S2: Imputing missing length data on BRUVS

Due to the random nature of fish behavior, all individually counted fish could not be measured. When possible, each species on each BRUVS was measured up to its abundance level to a limit of ten individuals to optimize processing time. A total of 3369 individual measures were used, from 281 out of the 443 (63%) species. Averaging the individual measures per species per BRUVS yielded 1315 averaged lengths. 2009 remaining lengths of species on different BRUVS were therefore imputed using the random forest algorithm and the *missForest* v1.4 R (Stekhoven & Buhlmann 2012) package with 999 trees. Lengths were estimated based on measured lengths when the species presented other records, but also family, genus, and maximum size and size type from FishBase (<https://www.fishbase.se>). Latitude and longitude of available lengths of species were also used to account for geographic proximity of existing lengths. The *missForest* accuracy was tested with a k-fold cross validation procedure by predicting 5% of the lengths each time by training the *missForest* on the 95% left of the data and look at the linear fit between the original and predicted value. Results showed a mean  $R^2$  of 0.82 (SD  $\pm 0.07$ ) between the measured and predicted lengths of the *missForest* model (Fig. S2).

As we did not seek highly accurate length structure among replicates but rather the general pattern of lengths and then biomass between assemblages among our stratum, we considered the imputed values exploitable with an average  $r^2$  of 0.84. We also ensured that imputed length did not exceed Fishbase's max reported length.

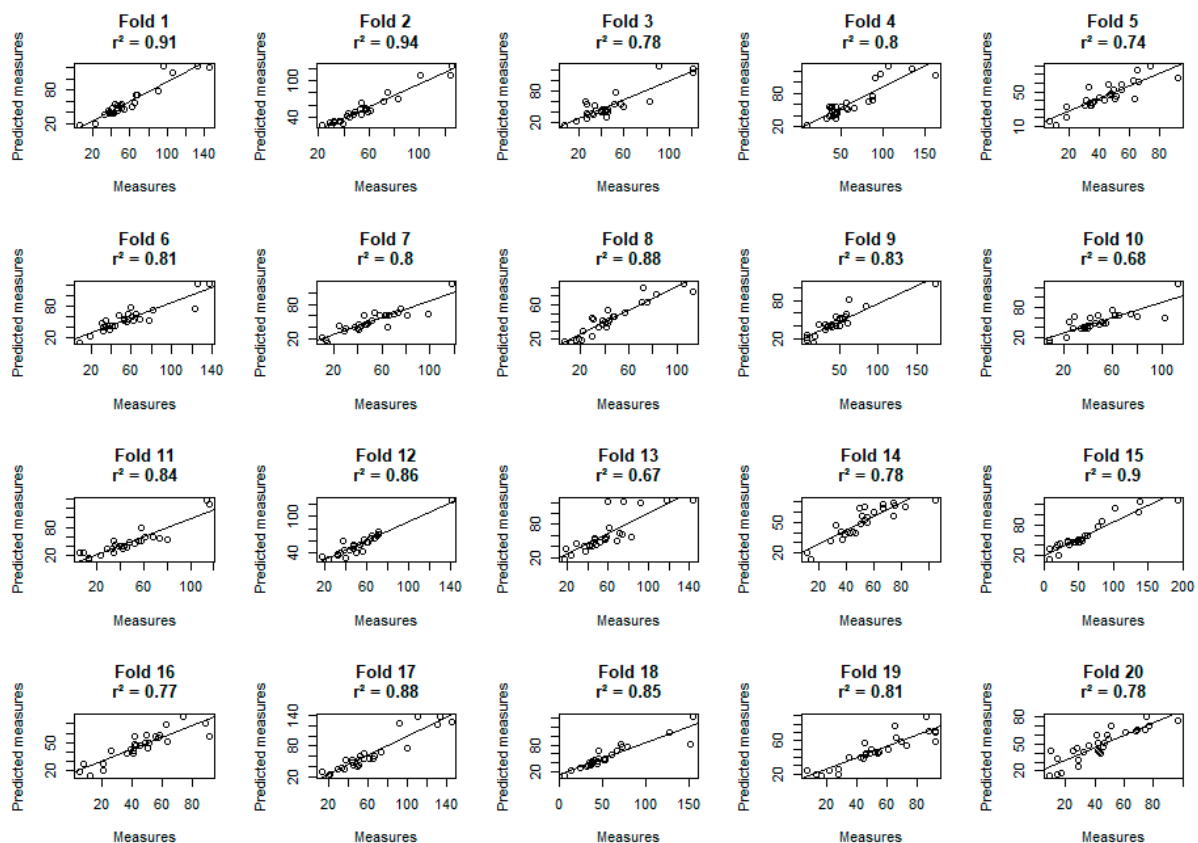

**Figure S1:** Predicted against true measures of fish for each of the twenty-fold cross-validation results from the 5% artificial imputation using *missForest* out of the 792-measurement data.

### **Supplementary Section S3: Boosted regression trees on richness, biomass and biomass of large predators**

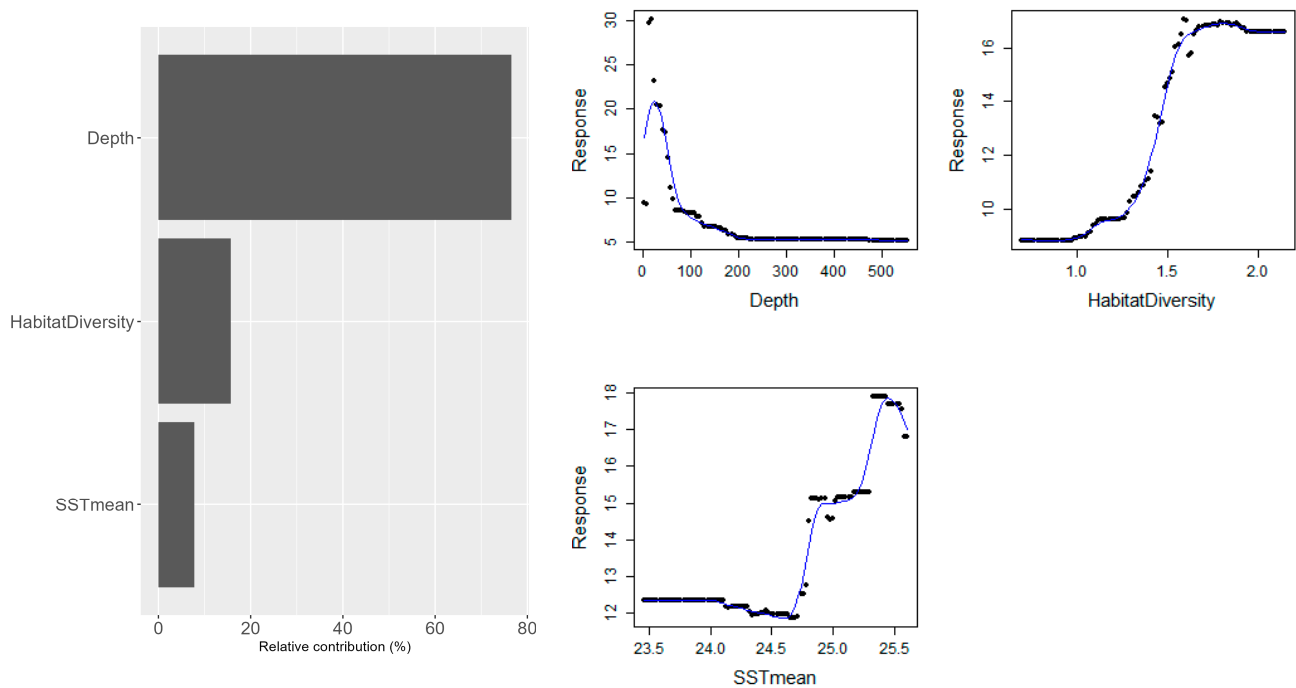

**Figure S2:** Variable importance and partial dependence plots from boosted regression trees ran on the reduced number of variables on BRUVS data with richness as the predicted value (response). Cross validation correlation value was 0.89 for this model.

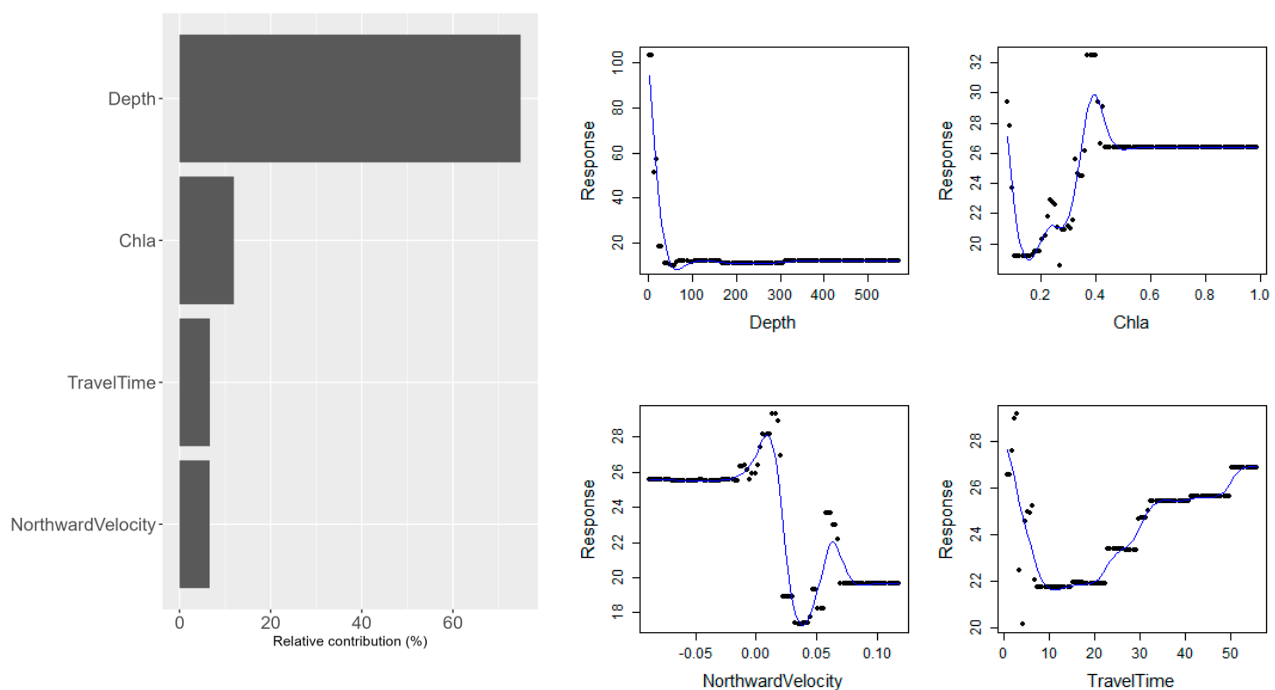

**Figure S3:** Variable importance and partial dependence plots from boosted regression trees ran on the reduced number of variables through previous boosted trees run on eDNA data with MOTU richness as the predicted value (response). Cross validation correlation value was 0.86 for this model.

**Figure S4:** Variable importance and partial dependance plots from boosted regression trees ran on the reduced number of variables through previous boosted trees run on BRUVS data with biomass as the predicted value (response). Cross validation correlation value was 0.71 for this model

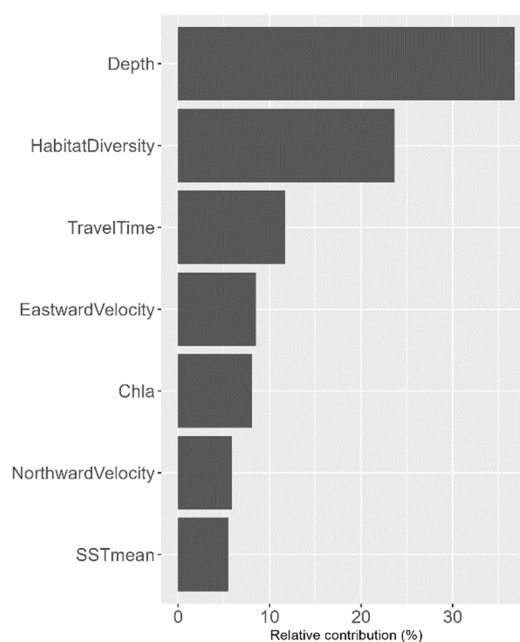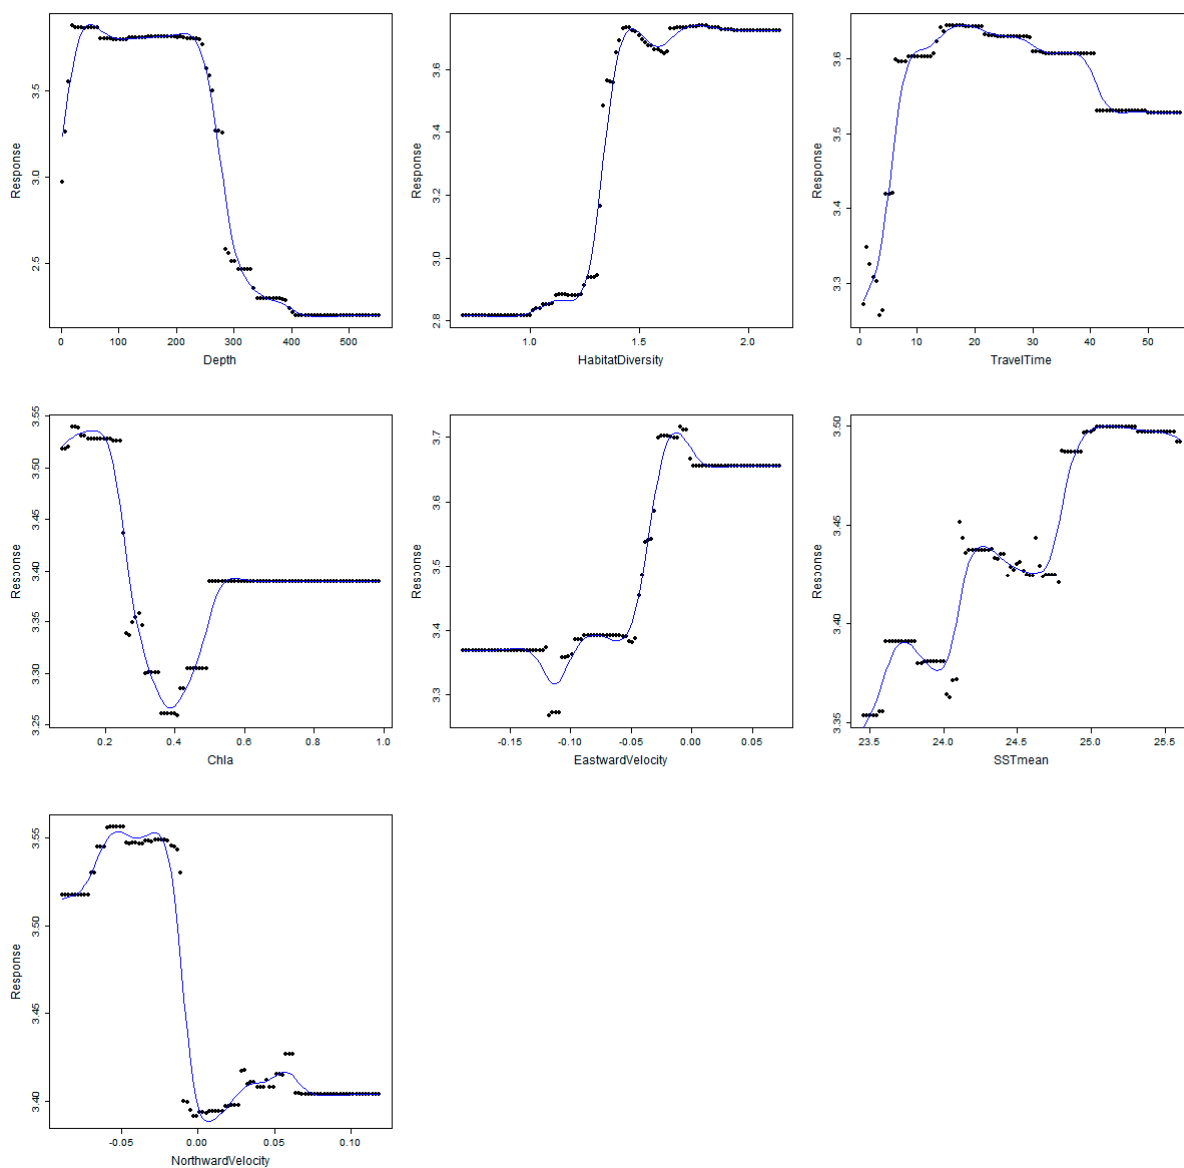

**Figure S5:** Variable importance and partial dependance plots from boosted regression trees ran on the reduced number of variables through previous boosted trees run on BRUVS data with biomass of large predators as the predicted value (response). Cross validation correlation value was 0.75 for this model.

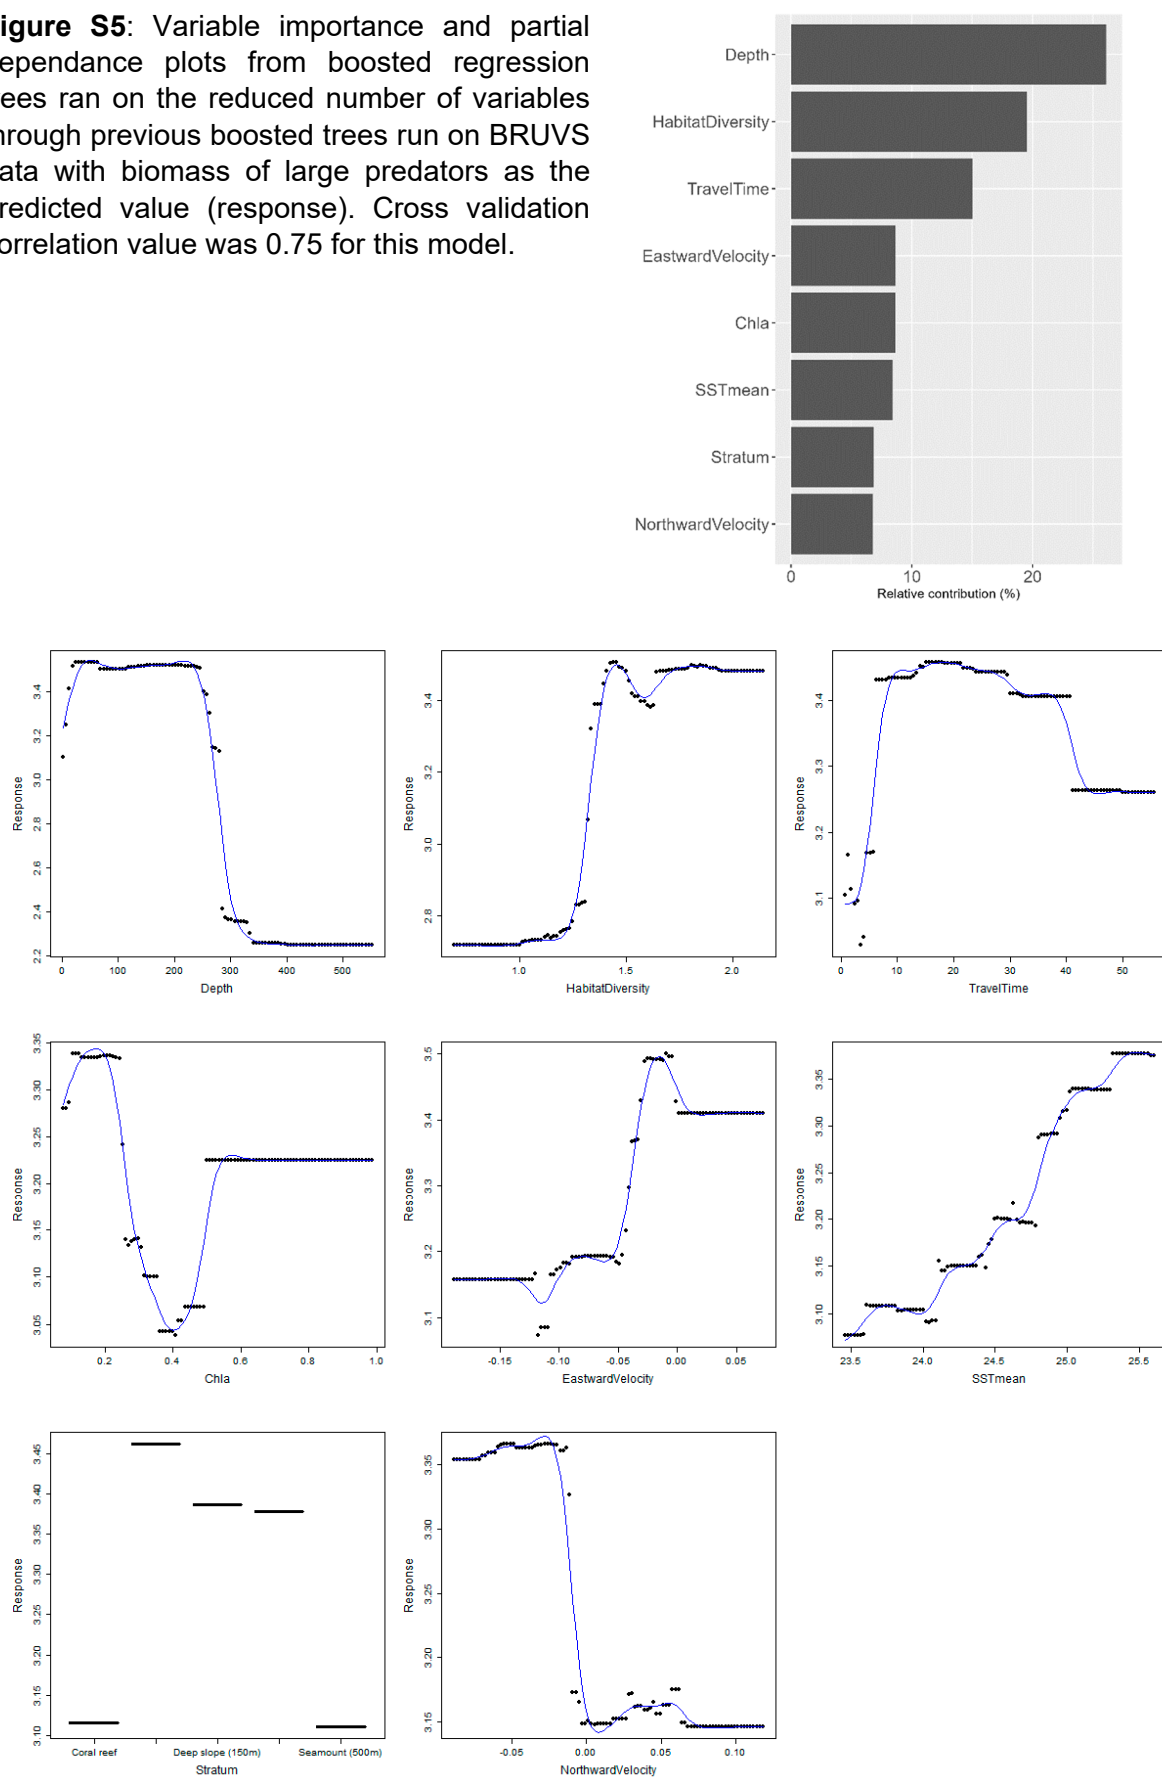



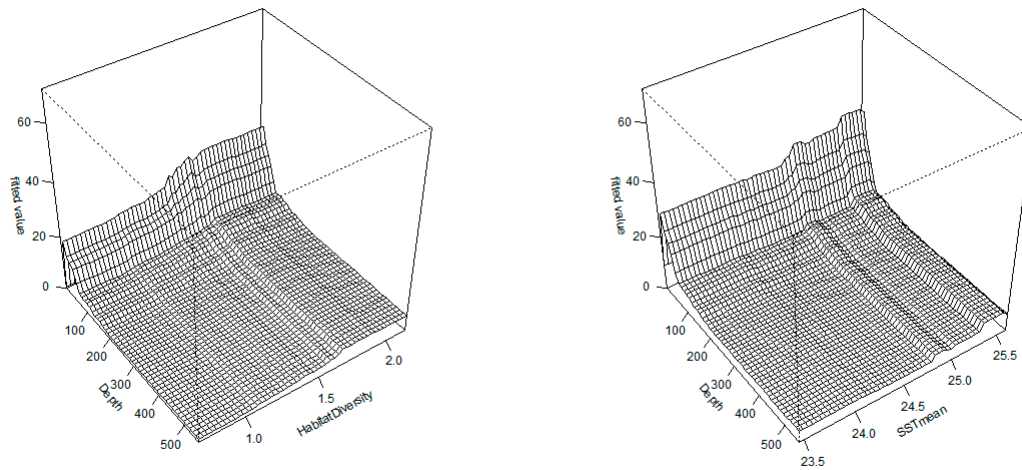

**Figure S6:** Interaction plots found from boosted regression trees run on the reduced number of variables on BRUVS data with richness as the predicted value (fitted value). Cross validation correlation value was 0.89 for this model.

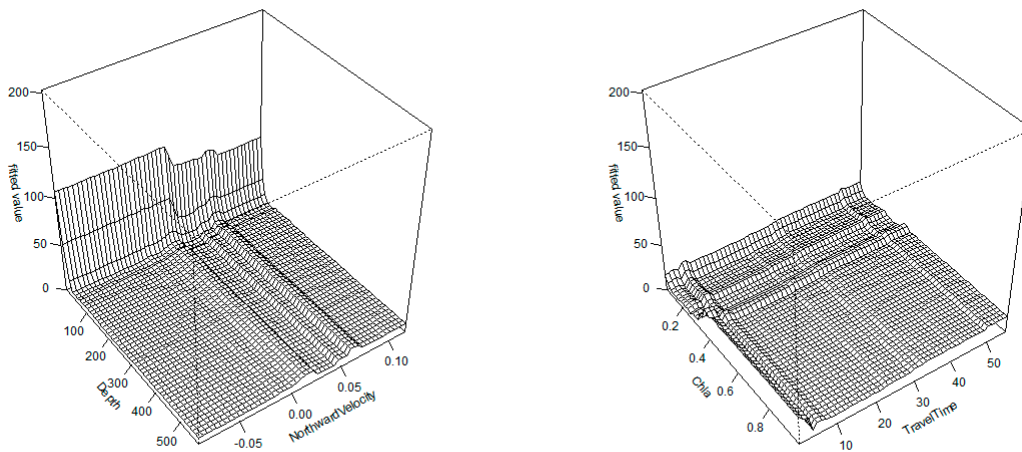

**Figure S7:** Interaction plots found from boosted regression trees run on the reduced number of variables through previous boosted trees run on eDNA data with MOTU richness as the predicted value (response). Cross validation correlation value was 0.86 for this model.

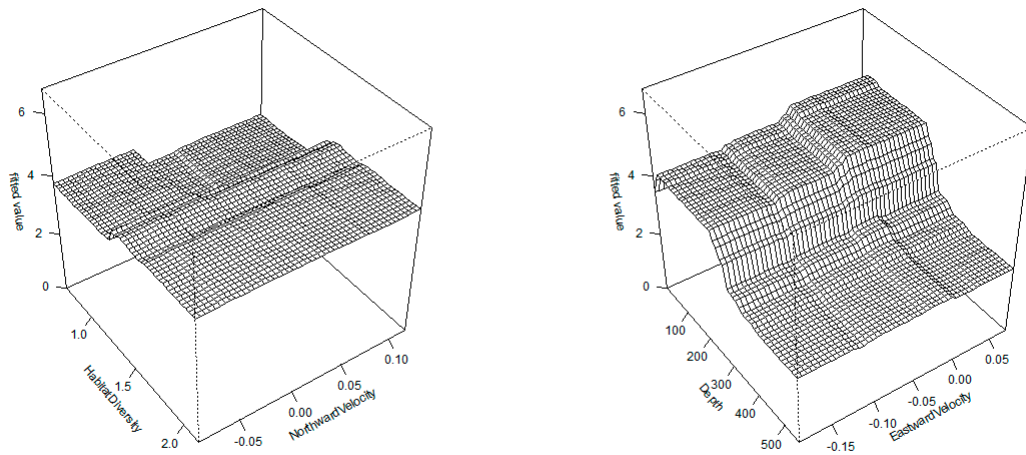

**Figure S8:** Interaction plots found from boosted regression trees run on the reduced number of variables through previous boosted trees run on BRUVS data with biomass as the predicted value (response). Cross validation correlation value was 0.71 for this model.

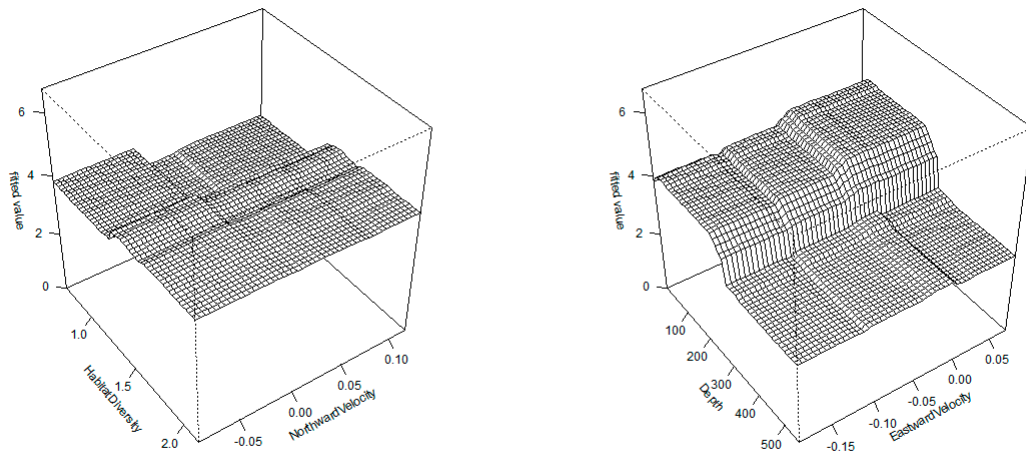

**Figure S9:** Interaction plots found from boosted regression trees run on the reduced number of variables through previous boosted trees run on BRUVS data with biomass of large predators as the predicted value (response). Cross validation correlation value was 0.75 for this model.

## Supplementary Section S4: Assemblage ordination

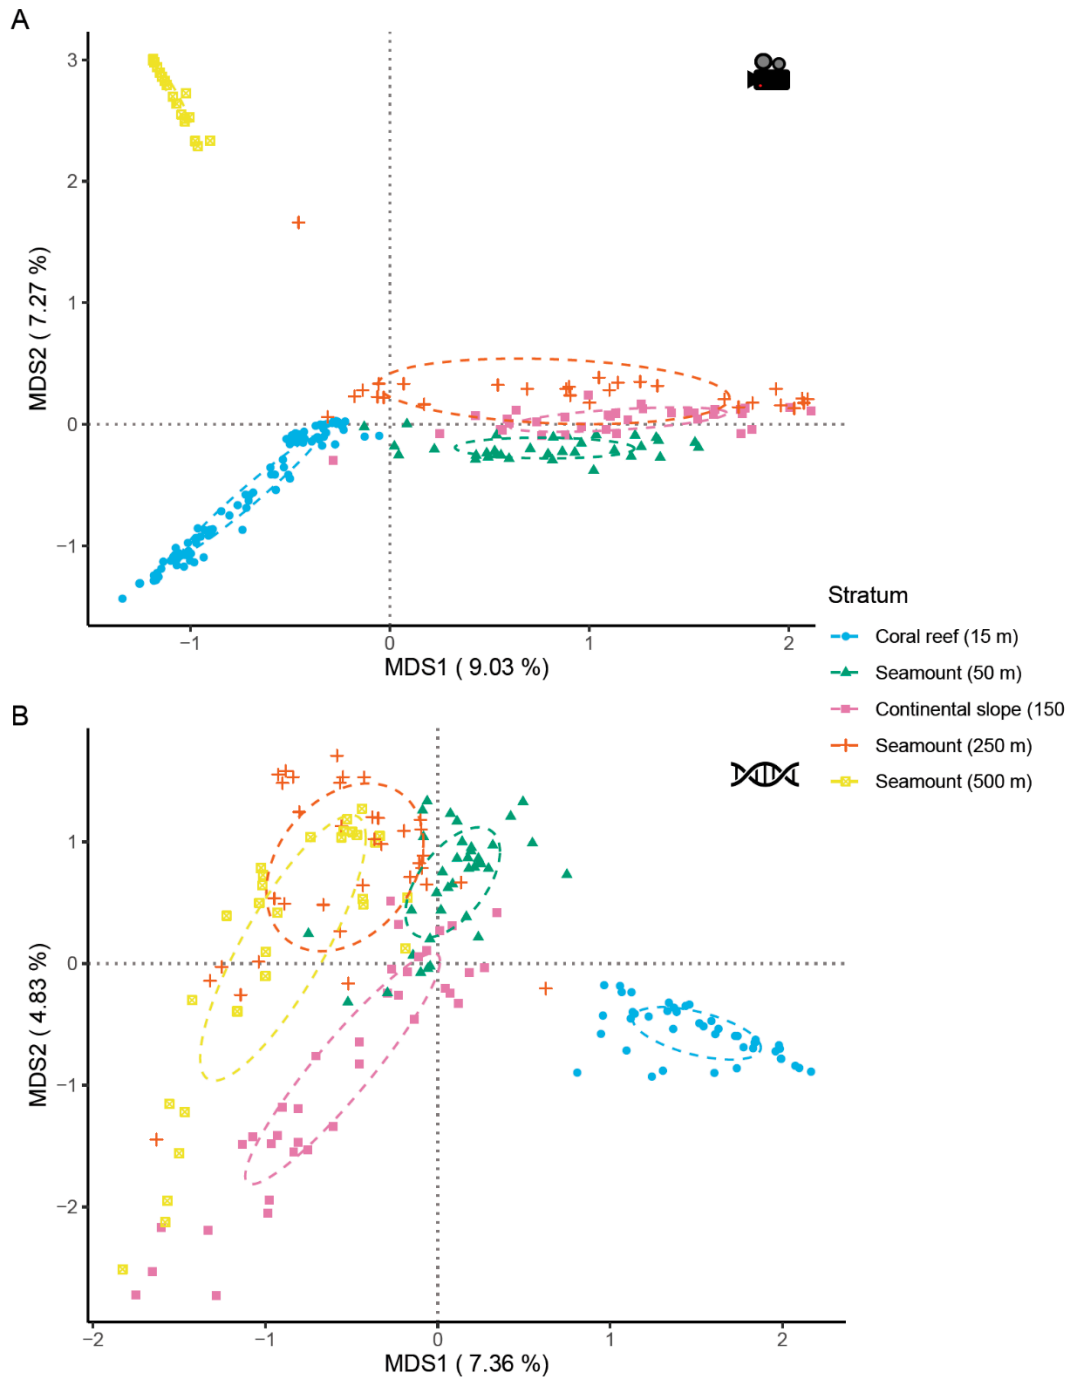

**Figure S10:** Ordination using Principal Coordinate Analysis (PCoA) on the Hellinger transformed distance matrix of baited remote underwater video stations (BRUVS) abundance data (A) and presence-absence environmental DNA (eDNA) data (B). Ellipses were calculated from the covavariance matrix of each stratum weighted by the number of points.

**Supplementary Section S5: sharing of eDNA sequences among the environmental strata**

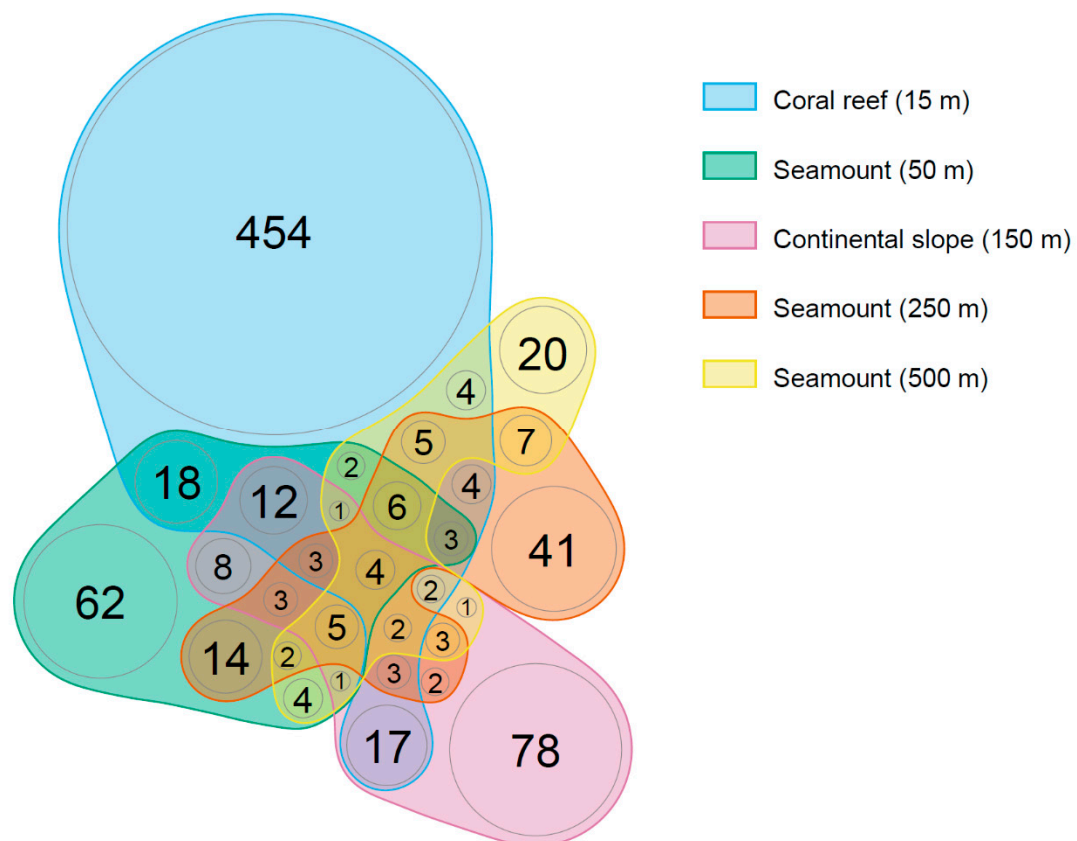

**Figure S11:** Euler diagram of identified MOTUs from eDNA metabarcoding along 5 environmental strata: coral reefs, seamounts of variable summit depths and continental slopes.

## **References**

- Baletaud F, Gilbert A, Mouillot D, Come J-M, Vigliola L. 2022. Baited video reveal fish diversity in the vast inter-reef habitats of a marine tropical lagoon. *Marine Biodiversity* **52**:16. Available from <https://link.springer.com/10.1007/s12526-021-01251-3>.
- Barletta M, Barletta-Bergan A, Saint-Paul U, Hubold G. 2005. The role of salinity in structuring the fish assemblages in a tropical estuary. *Journal of Fish Biology* **66**:45–72. Available from <https://onlinelibrary.wiley.com/doi/10.1111/j.0022-1112.2005.00582.x>.
- Boettiger C, Lang DT, Wainwright PC. 2012. rfishbase: exploring, manipulating and visualizing FishBase data from R. *Journal of Fish Biology* **81**:2030–2039. Wiley-Blackwell.
- Capblancq J. 1990. Nutrient dynamics and pelagic food web interactions in oligotrophic and eutrophic environments: an overview. *Hydrobiologia* **207**:1–14. Available from <http://link.springer.com/10.1007/BF00041435>.
- Eduardo LN, Frédou T, Lira AS, Ferreira BP, Bertrand A, Ménard F, Frédou FL. 2018. Identifying key habitat and spatial patterns of fish biodiversity in the tropical Brazilian continental shelf. *Continental Shelf Research* **166**:108–118. Elsevier Ltd. Available from <https://doi.org/10.1016/j.csr.2018.07.002>.
- Leitner AB, Neuheimer AB, Drazen JC. 2020. Evidence for long-term seamount-induced chlorophyll enhancements. *Scientific Reports* **10**:1–10. Nature Publishing Group UK. Available from <https://doi.org/10.1038/s41598-020-69564-0>.
- Letessier TB et al. 2019. Remote reefs and seamounts are the last refuges for marine predators across the Indo-Pacific. *PLOS Biology* **17**:e3000366. Available from <https://dx.plos.org/10.1371/journal.pbio.3000489>.
- Letessier TB, Juhel JB, Vigliola L, Meeuwig JJ. 2015. Low-cost small action cameras in stereo generates accurate underwater measurements of fish. *Journal of Experimental Marine Biology and Ecology* **466**:120–126. Elsevier B.V. Available from <http://dx.doi.org/10.1016/j.jembe.2015.02.013>.
- Maire E, Cinner J, Velez L, Huchery C, Mora C, Dagata S, Vigliola L, Wantiez L, Kulbicki M, Mouillot D. 2016. How accessible are coral reefs to people? A global assessment based on travel time. *Ecology Letters* **19**:351–360. Available from <http://doi.wiley.com/10.1111/ele.12577>.
- Priede IG et al. 2013. Does Presence of a Mid-Ocean Ridge Enhance Biomass and Biodiversity? *PLoS ONE* **8**.
- Rogers AD. 2018. The Biology of Seamounts: 25 Years on. Pages 137–224 *Advances in Marine Biology*. Available from <https://linkinghub.elsevier.com/retrieve/pii/S0065288118300038>.
- Sih T, Daniell J, Bridge T, Beaman R, Cappo M, Kingsford M. 2019. Deep-Reef Fish Communities of the Great Barrier Reef Shelf-Break: Trophic Structure and Habitat Associations. *Diversity* **11**:26. Available from <http://www.mdpi.com/1424-2818/11/2/26>.
- Stekhoven DJ, Buhlmann P. 2012. MissForest--non-parametric missing value imputation for mixed-type data. *Bioinformatics* **28**:112–118. Available from <https://academic.oup.com/bioinformatics/article-lookup/doi/10.1093/bioinformatics/btr597>.

Tittensor DP, Mora C, Jetz W, Lotze HK, Ricard D, Berghe E vanden, Worm B. 2010. Global patterns and predictors of marine biodiversity across taxa. *Nature* **466**:1098–1101.

Woolley SNC, Tittensor DP, Dunstan PK, Guillera-Arroita G, Lahoz-Monfort JJ, Wintle BA, Worm B, O'Hara TD. 2016. Deep-sea diversity patterns are shaped by energy availability. *Nature* **533**:393–396. Nature Publishing Group. Available from <http://dx.doi.org/10.1038/nature17937>.
